# Supplementary material for: Generating Patient-Derived HCC Cell Lines Suitable for Predictive In Vitro and In Vivo Drug Screening by Orthotopic Transplantation
Source: MDPI journal article supplement (doi:10.3390/cells13010082), 2023-12-30
Supplement: s1 [file s1]

Supplementary Figure S1

A

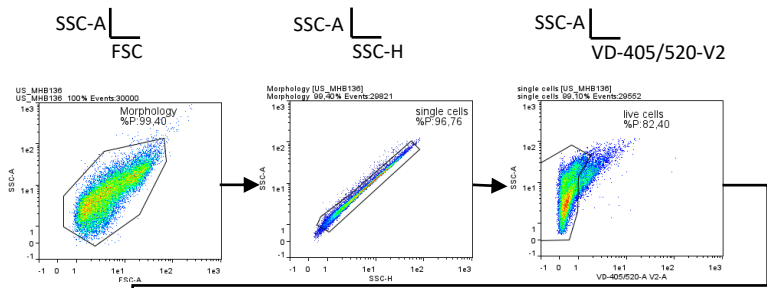

unstained  
control

B

Panel 1

Panel 2

Panel 3

Panel 4

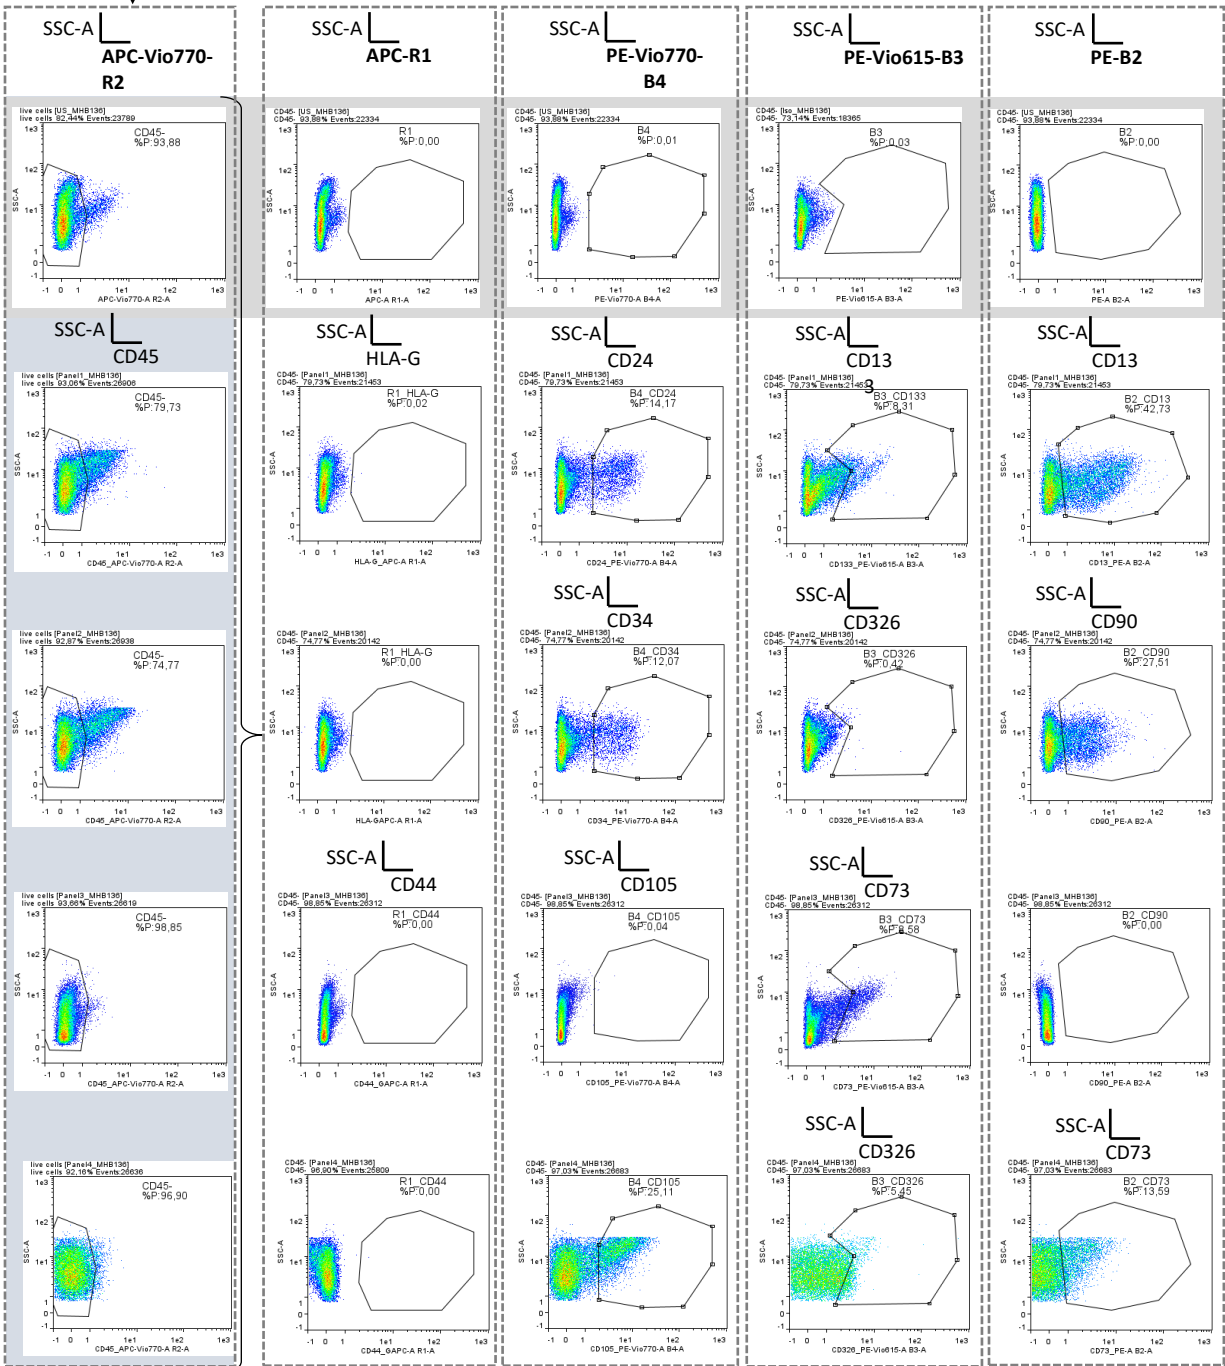

## **Supplementary Figure S1**

### **Representative flow cytometry gating strategy for identification of CSC marker**

**epitopes on the surface of pHCC-cells. (A)** Using a side scatter area (SSC-A) versus forward scatter (FSC) area the debris was excluded and cells of interest were included. Cells were gated on singularity by SSC-A versus SSC-Height (SSC-H) and further eliminated by excluding ViabilityDye (VD)-105/520 positive dead cells. Live cells feature the starting point for each CSC-panel's immune cell (CD45 positive) exclusion (blue background). Unstained pHCC-cells (grey background) of respective cell lines were used as negative controls to define fluorochrome-positive cells in the particular detection channel (APC-Vio770 represents channel R2, APC-R1, PE-Vio770-B4, PE-Vio615-B3 and PE-B2 versus SSC-A). **(B)** Each Antibody-Panel (1-4) represents an antibody-cocktail of five CSC-specific antibodies (Ab). Antibodies (Abs) in Panel 1 are specific for the epitopes HLA-G-R1, CD-24-B4, CD133-B3 and CD13-B2. Panel 2 includes Ab against HLA-G-R1, CD34-B4, CD326-B3 and CD90-B2. Panel 3's Abs are specific for CD44-R1, CD105-B4, CD73-B3 and CD90-B2. Panel 4 compromises CD44-R1, CD105-B4, CD326-B3 and CD73-B2 specific Abs.

Supplementary Figure S2

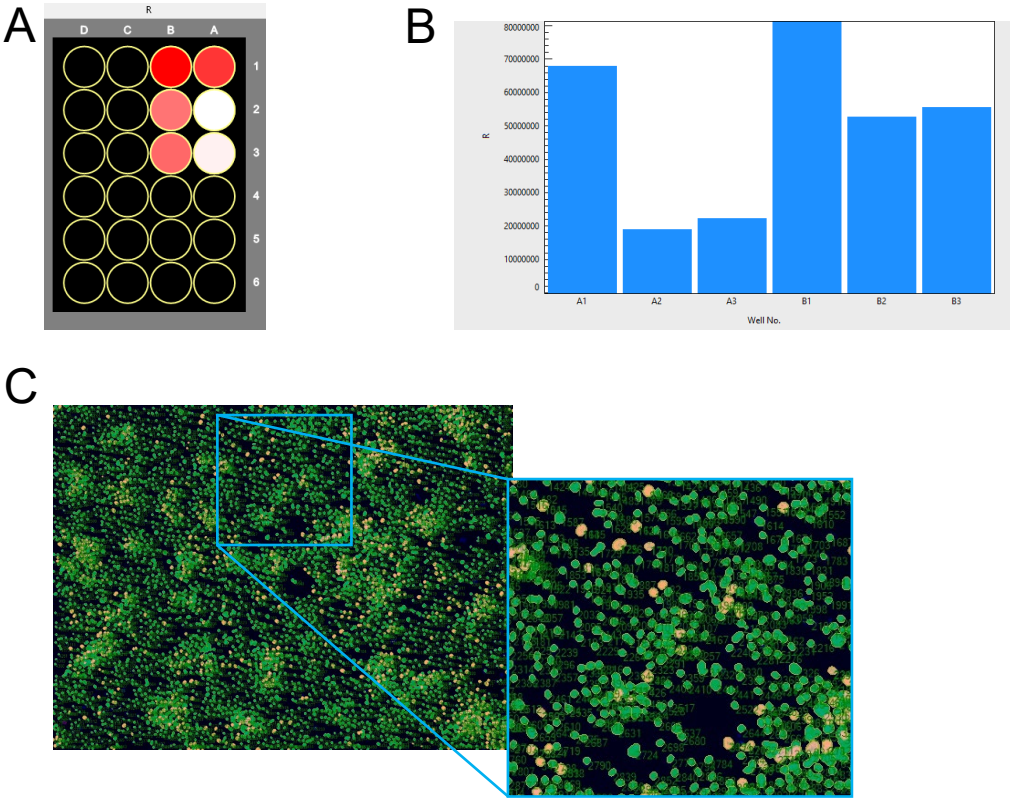

## **Supplementary Figure S2**

### **Representative analysis output data from macro cell counts used to quantify BrU positive pHCC-cells.**

**(A-C)** Output data generated by the Macro cell count program from Keyence. **(A)** Displays scanned plate and well position, which was counted. A1, B1 = untreated controls, A2, A3 represent pHCC-cells treated with 3,3 $\mu$ M 5-FU and B2, B3 present the pHCC-cells treated with 1,1 $\mu$ M 5-FU. The overall intensity displayed in A was plotted in **(B)** against counted wells; well IDs are mentioned at the x-axis. In every well, six positions were counted under the same conditions (position in well and extension). A representative merged and counting capture is displayed in **(C)**, including numbers for the counting area = DAPI stained nuclei (green) and the target area stained in Alexa-555 BrU assembled new synthesized DNA (yellow).

Supplementary Figure S3

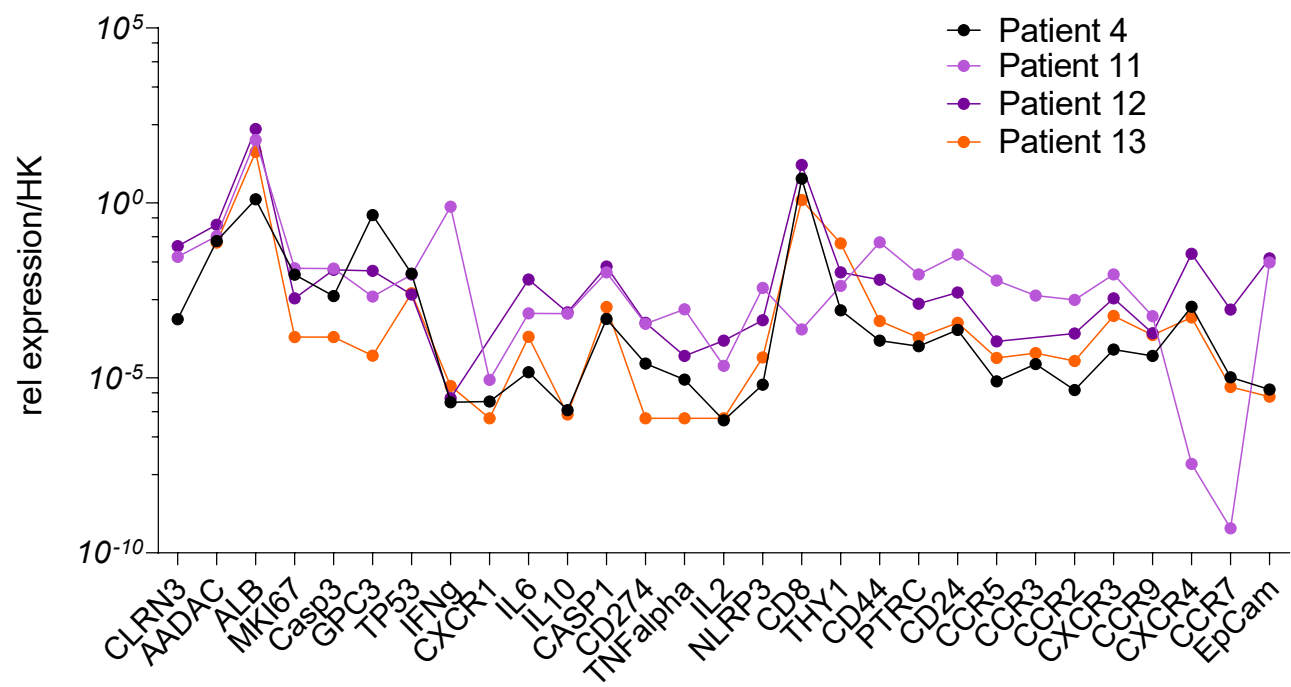

### **Supplementary Figure S3**

#### **Gene expression level of tissue sample from patients.**

Determination of liver-specific and inflammatory markers at RNA level from tissues derived from patient material included in the study. RNA gene expression data were normalized against human-specific housekeeper genes GapDH and RPL30.

Supplementary Figure S4

A

| Maus ID | cells transplanted | time tumor growth | Photons total flux (p/s) |
|---------|--------------------|-------------------|--------------------------|
| 106     | HUH-7_Luc          | 3,14              | 2.6E+09                  |
| 92      | Hep3B_Luc          | 5,1               | 7.8E+08                  |
| 247     | cHB-LC11_Luc       | 15                | 7.30E+07                 |
| 250     | cHB-LC11_Luc       | 15                | 1.20E+07                 |

B

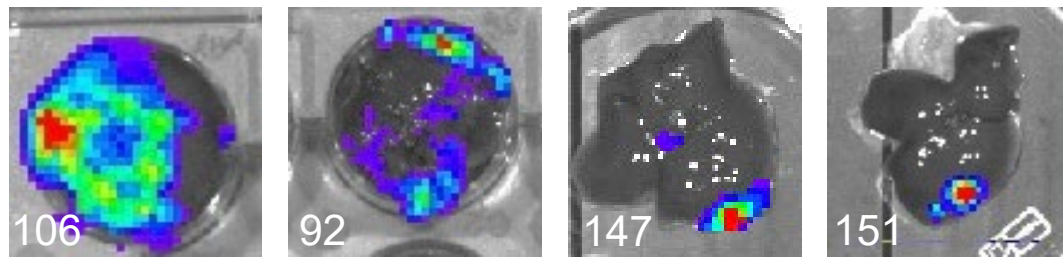

## **Supplementary Figure S4**

### **Orthotopic transplantation of stable luciferase transduced HCC cell line HUH-7, Hep3B vs. pHCC cell lines.**

(A) Table of transplanted mice included ID, cell type, time of tumor development and measurement of total bioluminescence *in-vivo* before scarification. (B) Overlay of photographs and bioluminescence measurement from mouse livers after scarification. Auto-modus detected bioluminescence; luciferin injection was performed 10min before detection.



Supplementary Figure S5

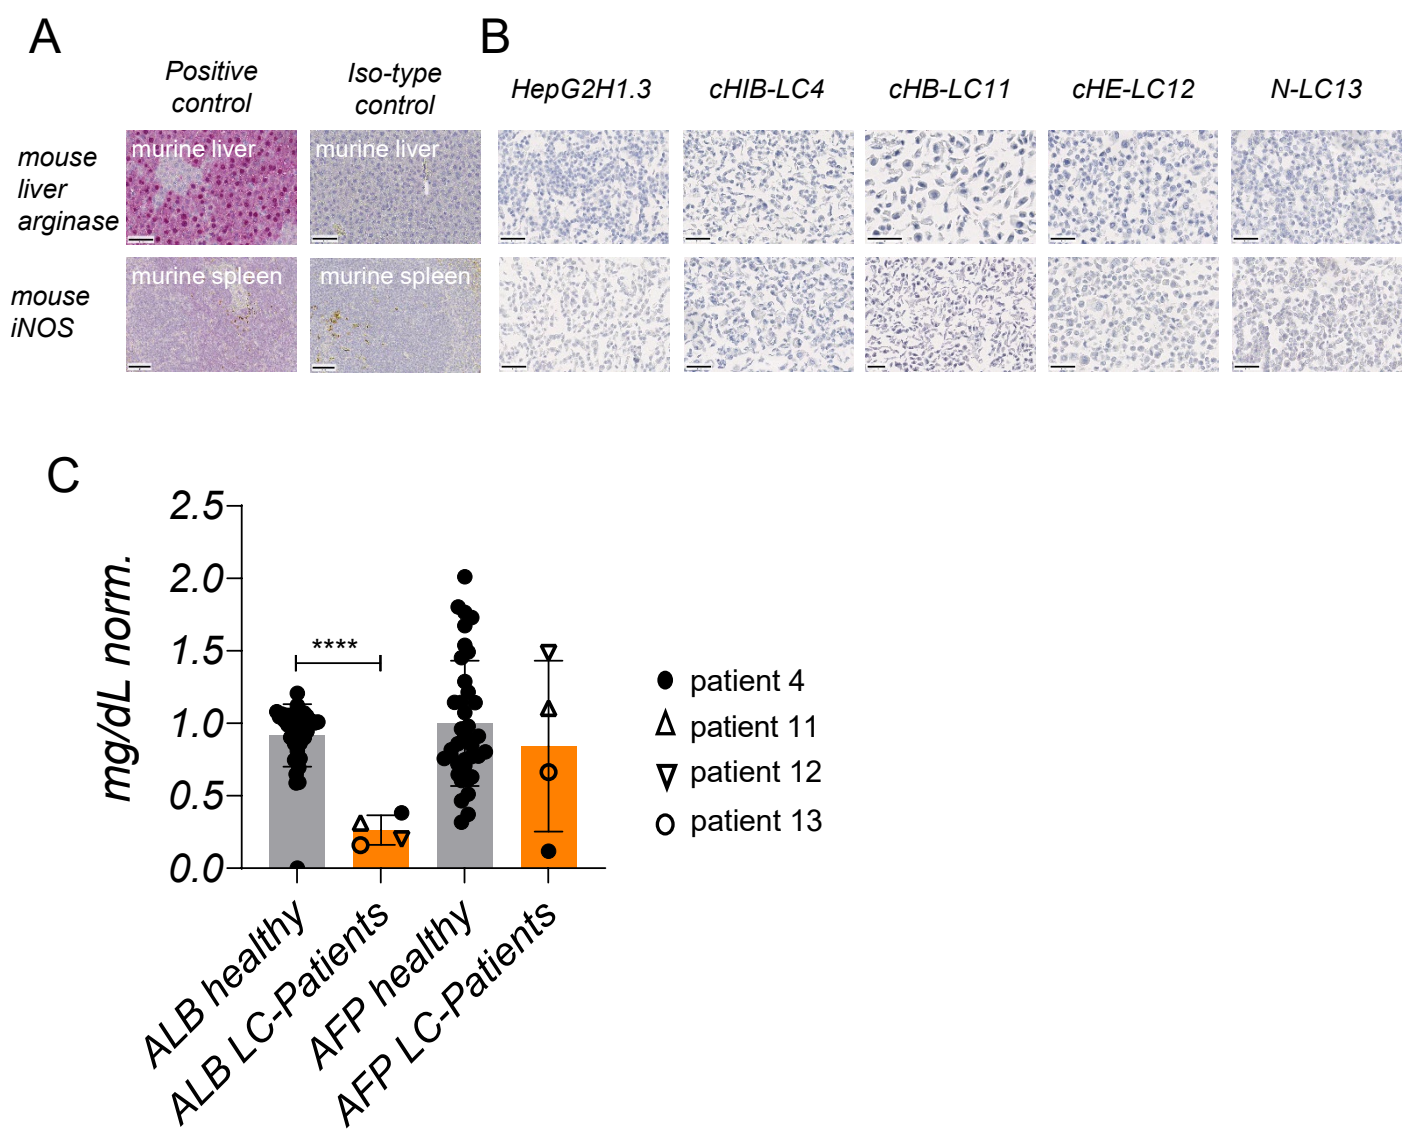

## **Supplementary Figure S5**

**Immunohistochemical staining of HepG2H1.3-and pHCC-cells against murine antigens.** (A) Murine reference tissues expressing Liver Arginase (murine liver) and iNOS (murine spleen) were used for positive and negative isotype control staining. (B) Cell pellets of immortalized cell line HepG2H1.3 agar and pHCC cell lines embedded in the agar were stained against murine Liver Arginase and iNOS to verify no cross-contamination with murine cells in cell culture after pHCC cell isolation. (C) Determination of human Alpha-fetoprotein and human Albumin protein levels in the plasma samples obtained from whole blood samples (n=4) after PBMC isolation procedure. Plasma levels were plotted against a healthy donor (n= 36) cohort and normalized against background controls. Bar chart represents mean  $\pm$  SD; \*\*\*\*p  $\leq$  0.0001 using a two-tailed unpaired t-test.

**Supplementary Table S1: Table of Antibodies used for IHC and IF staining**

| Antigen            | Producer          | Target            | Company        |
|--------------------|-------------------|-------------------|----------------|
| Vimentin           | mouse monoclonal  | human             | Santa Cruz     |
| CD31               | mouse polyclonal  | human, mouse, pig | Invitrogene    |
| CK18               | mouse monoclonal  | human             | ExBIO          |
| PD-L1              | rabbit polyclonal | human             | GeneTex        |
| CD68               | mouse monoclonal  | human             | Dako           |
| Calnexin           | rabbit monoclonal | human             | ThermoFischer  |
| CD44               | rabbit Polyclonal | human, mouse, rat | ThermoFischer  |
| NTCP               | rabbit monoclonal | human             | ThermoFischer  |
| HNF4               | goat polyclonal   | human             | ThermoFischer  |
| CD24               | rat polyconal     | human             | ThermoFischer  |
| Ki67               | rat monoclonal    | human             | Origene        |
| Actin              | rabbit Polyclonal | human, mouse      | Abcam          |
| CK19               | rabbit monoclonal | human             | Avivasysbio    |
| EpCam              | mouse monoclonal  | human             | Origene        |
| Desmin / CD33      | mouse monoclonal  | human             | Dako Aglient   |
| Alpha Anti Trypsin | mouse monoclonal  | human             | Biotrend       |
| CD90               | mouse monoclonal  | human             | BD Bioscience  |
| EGFR               | mouse monoclonal  | human             | Thermo Fischer |
| CK7                | mouse monoclonal  | human             | Dako Aglient   |
| CK8                | mouse monoclonal  | human             | santa cruz     |
| AFP                | mouse monoclonal  | human             | Thero Fischer  |
| Caspase3           | rabbit Polyclonal | human             | Invitrogene    |
| AADAC              | rabbit Polyclonal | human             | proteintech    |

**Supplementary Tabel S2: List of TaqMan Probes**

| Probe | Assay-ID       |
|-------|----------------|
| GapDH | Hs999999905_m1 |
| RPL30 | Hs00265497_m1  |
| ALB   | Hs00609411_m1  |
| AFP   | Hs01040598_m1  |
| CD44  | Hs01075864_m1  |
| HNF4A | Hs00230853_m1  |
| EGFR  | Hs01076090_m1  |
| CK19  | Hs00761767_s1  |
